# Supplementary material for: Early Changes in Quantitative Ultrasound Imaging Parameters during Neoadjuvant Chemotherapy to Predict Recurrence in Patients with Locally Advanced Breast Cancer
Source: MDPI journal article supplement (doi:10.3390/cancers14051247), 2022-02-28
Supplement: s1 [file s1]

**Spectral features**

MBF

SS

SI

SAS

ACE

ASD

AAC

**Texture features**

MBF\_CON

MBF\_COR

AAC\_CON\_CON

AAC\_CON\_COR

AAC\_CON\_ENE

AAC\_CON\_HOM

AAC\_COR\_CON

AAC\_COR\_COR

AAC\_COR\_ENE

AAC\_COR\_HOM

AAC\_ENE\_CON

AAC\_ENE\_COR

AAC\_ENE\_ENE

AAC\_ENE\_HOM

AAC\_HOM\_CON

AAC\_HOM\_COR

AAC\_HOM\_ENE

AAC\_HOM\_HOM

ASD\_CON\_CON

MBF\_ENE

MBF\_HOM

SS\_CON

SS\_COR

SS\_ENE

SS\_HOM

SI\_CON

SI\_COR

SI\_ENE

SI\_HOM

SAS\_CON

SAS\_COR

ASD\_CON\_COR

ASD\_CON\_ENE

ASD\_CON\_HOM

ASD\_COR\_CON

ASD\_COR\_COR

ASD\_COR\_ENE

ASD\_COR\_HOM

ASD\_ENE\_CON

ASD\_ENE\_COR

ASD\_ENE\_ENE

ASD\_ENE\_HOM

ASD\_HOM\_CON

ASD\_HOM\_COR

ASD\_HOM\_ENE

ASD\_HOM\_HOM

MBF\_CON\_CON

MBF\_CON\_COR

SAS\_ENE

SAS\_HOM

ASD\_CON

ASD\_COR

ASD\_ENE

ASD\_HOM

AAC\_CON

AAC\_COR

AAC\_ENE

AAC\_HOM

**Texture derivatives**

MBF\_CON\_ENE

MBF\_CON\_HOM

MBF\_COR\_CON

MBF\_COR\_COR

MBF\_COR\_ENE

MBF\_COR\_HOM

MBF\_ENE\_CON

MBF\_ENE\_COR

MBF\_ENE\_ENE

MBF\_ENE\_HOM

MBF\_HOM\_CON

MBF\_HOM\_COR

MBF\_HOM\_ENE

MBF\_HOM\_HOM

SI\_CON\_CON

SI\_CON\_COR

SI\_CON\_ENE

|            |            |            |
|------------|------------|------------|
| SI_CON_HOM | SI_ENE_CON | SI_HOM_COR |
| SI_COR_CON | SI_ENE_COR | SI_HOM_ENE |
| SI_COR_COR | SI_ENE_ENE | SI_HOM_HOM |
| SI_COR_ENE | SI_ENE_HOM |            |
| SI_COR_HOM | SI_HOM_CON |            |

MBF: Mid-band fit, SS: Spectral slope, SI: Spectral intercept, SAS: Spacing among scatterers, ACE: Attenuation coefficient estimation, ASD: Acoustic scatterer diameter (ASD)- Anderson and average acoustic-scatterer concentration (AAC), CON: Contrast, COR: Correlation parameter, HOM: Homogeneity, ENE: Energy
