# Supplementary material for: Early Changes in Quantitative Ultrasound Imaging Parameters during Neoadjuvant Chemotherapy to Predict Recurrence in Patients with Locally Advanced Breast Cancer
Source: MDPI journal article supplement (doi:10.3390/cancers14051247), 2022-02-28
Supplement: s1 [file s1]

Table S1. The survival outcomes (recurrence-free survival) as predicted by the classifiers after the development of the model. Abbreviations: k-NN: k Nearest Neighbors; SVM: Support Vector Machine with radial basis function kernel.

| Classifiers | Predicted Group | 5-year predicted RFS<br>(95% confidence interval) | <i>p</i> -value |
|-------------|-----------------|---------------------------------------------------|-----------------|
| k-NN        | Recurrence      | 56% (44–69%)                                      | 0.001           |
|             | Non-Recurrence  | 93% (84–99%)                                      |                 |
| SVM         | Recurrence      | 53% (38–68%)                                      | 0.003           |
|             | Non-Recurrence  | 87% (76–97%)                                      |                 |

**a. Extraction of power spectrum**

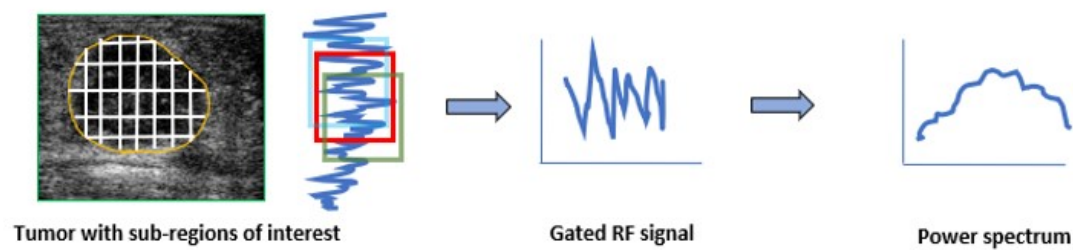

**b. Data normalization and extraction of spectral data**

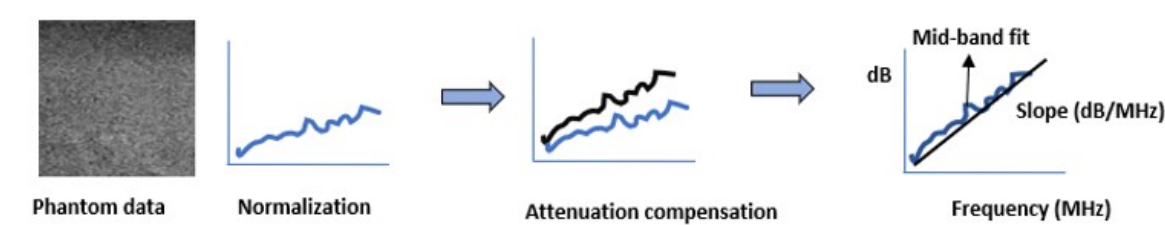

**c. Parametric maps and texture analysis**

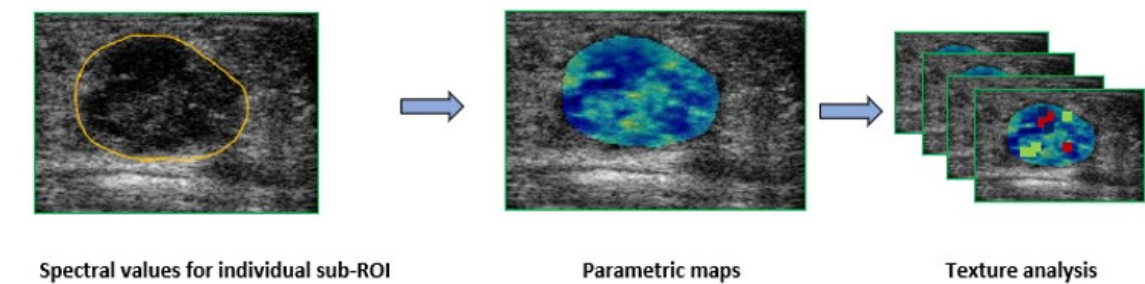

Figure S1. Study methodology summarizing feature processing.
